# Supplementary material for: Characterisation of a Novel Cell Line (ICR-SS-1) Established from a Patient-Derived Xenograft of Synovial Sarcoma
Source: MDPI journal article supplement (doi:10.3390/cells11152418), 2022-08-04
Supplement: s1 [file s1]

**Table S1.** Small molecule inhibitor screen with associated primary target(s) and supplier.

| <b>Inhibitor</b>                    | <b>Primary Target(s)</b>     | <b>Supplier</b>   |
|-------------------------------------|------------------------------|-------------------|
| <b>Lenvatinib</b>                   | Broad Spectrum: RTKs         | LC Labs           |
| <b>Sunitinib</b>                    | Broad Spectrum: RTKs         | LC Labs           |
| <b>Pazopanib</b>                    | Broad Spectrum; RTKs         | LC Labs           |
| <b>Ponatinib</b>                    | Broad spectrum; RTKs         | LC Labs           |
| <b>Regorafenib</b>                  | Broad Spectrum: RTKs         | LC Labs           |
| <b>Bosutinib</b>                    | Src, Abl                     | LC Labs           |
| <b>Dasatinib</b>                    | Abl, Src, c-Kit              | LC Labs           |
| <b>Saracatinib</b>                  | Src                          | Selleck Chemicals |
| <b>Ceritinib</b>                    | ALK                          | LC Labs           |
| <b>Crizotinib</b>                   | c-Met, ALK                   | LC Labs           |
| <b>NVP-TAE684</b>                   | ALK                          | Selleck Chemicals |
| <b>AZD9291</b>                      | EGFR                         | Selleck Chemicals |
| <b>EAI045</b>                       | EGFR                         | Selleck Chemicals |
| <b>Erlotinib</b>                    | EGFR                         | LC Labs           |
| <b>Gefitinib</b>                    | EGFR                         | LC Labs           |
| <b>Lapatinib</b>                    | EGFR, ErbB2                  | Selleck Chemicals |
| <b>Neratinib</b>                    | HER2, EGFR                   | LC Labs           |
| <b>BGJ398</b>                       | FGFR1/2/3                    | Selleck Chemicals |
| <b>Linsitinib</b>                   | IGF-1R                       | LC Labs           |
| <b>NVP-AEW541</b>                   | IGF-1R, InsR                 | Selleck Chemicals |
| <b>Imatinib</b>                     | v-Abl, c-Kit, PDGFR $\alpha$ | LC Labs           |
| <b>Cediranib</b>                    | VEGFR                        | LC Labs           |
| <b>Foretinib</b>                    | HGFR, VEGFR                  | LC Labs           |
| <b>Sorafenib</b>                    | Raf-1, B-Raf, VEGFR2         | LC Labs           |
| <b>Vandetanib</b>                   | VEGFR2                       | LC Labs           |
| <b>BI2536</b>                       | Plk1                         | Selleck Chemicals |
| <b>BX-795</b>                       | PDK1                         | Sigma-Aldrich     |
| <b>NVP-BEZ235</b>                   | PI3K, mTOR                   | LC Labs           |
| <b>Rapamycin</b>                    | mTOR                         | LC Labs           |
| <b>Binimetinib</b>                  | MEK1/2                       | LC Labs           |
| <b>Trametinib</b>                   | MEK1/2                       | LC Labs           |
| <b>Dabrafenib</b>                   | BRAFV600                     | Selleck Chemicals |
| <b>SB203580</b>                     | p38 MAPK                     | LC Labs           |
| <b>SP600125</b>                     | JNK                          | LC Labs           |
| <b>NVP-AUY922</b>                   | HSP90                        | LC Labs           |
| <b>AZD5363</b>                      | Akt1/2/3                     | Selleck Chemicals |
| <b>MK2206</b>                       | Akt1/2/3                     | Selleck Chemicals |
| <b>Momelotinib</b>                  | JAK1/2                       | Selleck Chemicals |
| <b>Niclosamide</b>                  | STAT3                        | Selleck Chemicals |
| <b>SH-4-54</b>                      | STAT                         | Selleck Chemicals |
| <b>Cilengitide Trifluoroacetate</b> | Integrin                     | Selleck Chemicals |
| <b>Navitoclax</b>                   | Bcl-xL, Bcl-2, Bcl-w         | Selleck Chemicals |
| <b>Galunisertib</b>                 | TGF $\beta$ -R1              | Selleck Chemicals |
| <b>Entrectinib</b>                  | TrkA/B/C, ROS1, ALK          | Selleck Chemicals |
| <b>GW441756</b>                     | TrkA                         | Selleck Chemicals |
| <b>BMS345541</b>                    | IKK-1/2                      | Selleck Chemicals |
| <b>GSK126</b>                       | EZH2 Methyltransferase       | Selleck Chemicals |
| <b>XAV-939</b>                      | Tankyrase-1/2                | Selleck Chemicals |
| <b>PF562271</b>                     | FAK                          | Selleck Chemicals |
| <b>TAE226</b>                       | FAK                          | Selleck Chemicals |
| <b>Alisertib</b>                    | Aurora A                     | Selleck Chemicals |
| <b>JQ1</b>                          | BET Bromodomain              | Selleck Chemicals |

|                      |        |                   |
|----------------------|--------|-------------------|
| <b>LY2603618</b>     | Chk1   | Selleck Chemicals |
| <b>MK-8776</b>       | Chk1   | Selleck Chemicals |
| <b>Palbociclib</b>   | CDK4/6 | LC Labs           |
| <b>Silmitasertib</b> | CK2    | Selleck Chemicals |
| <b>Rucaparib</b>     | PARP   | LC Labs           |
| <b>Talazoparib</b>   | PARP   | Selleck Chemicals |
